# Supplementary material for: Synthesis and photoluminescence of Eu3+-activated double perovskite NaGdMg(W, Mo)O6– a potential red phosphor for solid state lighting
Source: Royal Society of Chemistry journal article supplement (doi:10.1039/c2tc00189f), 2012-10-18
Supplement: c2tc00189f.pdf [file c2tc00189f.pdf]

## Electronic Supplementary Information

### Synthesis and photoluminescence of $\text{Eu}^{3+}$ -activated double perovskite $\text{NaGdMg(W, Mo)O}_6$ — a potential red phosphor for solid state lighting

Le Zhang, and Qitu Zhang\*

College of Materials Science and Engineering, Nanjing University of Technology, 5 Xinmofan Road, Nanjing, Jiangsu, P.R. China. Tel: +86-25-83587246; E-mail: njutzl@163.com.

#### Experimental

An improved citrate- EDTA complexing method was first used to synthesize double perovskite samples. The starting materials were  $\text{Eu}_2\text{O}_3$  (99.99%),  $\text{Gd}_2\text{O}_3$  (99.99%),  $\text{Mg}(\text{NO}_3)_2 \cdot 6\text{H}_2\text{O}$  (AR),  $\text{NaNO}_3$  (AR),  $(\text{NH}_4)_6\text{Mo}_7\text{O}_{24} \cdot 4\text{H}_2\text{O}$  (AR) and  $\text{H}_{40}\text{N}_{10}\text{O}_{41}\text{W}_{12}$  (AR). EDTA( $\text{C}_{10}\text{H}_{16}\text{N}_2\text{O}_8$ , AR) and citric acid ( $\text{C}_6\text{H}_8\text{O}_7$ , AR) are complexing agents and their mole ratios to the total metallic ions were 2.0 and 1.0, respectively.

Stoichiometric amounts of  $\text{Eu}_2\text{O}_3$  and  $\text{Gd}_2\text{O}_3$  were dissolved in  $\text{HNO}_3$  under vigorous stirring. Then all nitrate were added in the deionized water and stirred homogenously (solution A,  $S_A$ ). The ammonium molybdate was also dissolved in deionized water under the help of  $\text{NH}_3 \cdot \text{H}_2\text{O}$  ( $S_B$ ). Then the citric acid was added in the mixed solution of  $S_A$  and  $S_B$ . After completely dissolved, the pH value of the solution was modulated to 6.0~7.0. At last, the solution of ammonium tungstate was added in the mixed solution. *A disordered addition should be avoided, or the unknown*

***precipitation will easily appear.*** The heated temperature all above process was 30~50 °C. Then the mixed solution was heated to 60~70 °C and continuously stirred using a magnetic agitator for about an hour to obtain transparent solution. Moreover, it became transparent sol until removing the excess water. After then, the gel was put into an oven at 180~200 °C for 4 hours to suffer a combustion reaction. Finally, the precursor was pre-calcined at 600 °C for 4 hours to remove the organic elements and then calcined at 1100 °C for 6 hours. Series of NaGdMg(W<sub>1-x</sub>Mo<sub>x</sub>)O<sub>6</sub>: Eu powders ( $x=0.0, 0.1, 0.3, 0.5, 0.7, 0.9$ ) were prepared.

In addition, the commercial Y<sub>2</sub>O<sub>2</sub>S: Eu<sub>0.05</sub> and CaMoO<sub>4</sub>: Eu<sub>0.3</sub> phosphors were provided by (Changshu YaTai fluorescence material co., LTD, Jiang Su, China) to compare the photoluminescence properties with the as-synthesized red phosphor.

### **Characterization of samples**

The crystalline phases of synthesized powders were determined by X-ray diffraction (XRD, D/Max2500, Rigaku, Japan) using Cu K $\alpha$  radiation ( $\lambda=1.5406$  Å) in the range of 5° ~ 80° with a step size of 0.02°. Crystal structure was refined using Rietveld method as implanted in GSAS software suite.<sup>1, 2</sup> Element contents were determined by inductively coupled plasma optical emission spectrometry (ICP-OES). Reflection spectra were recorded on a Shimadzu UV-3100 UV-Vis-NIR spectrophotometer with BaSO<sub>4</sub> as the reference. The photoluminescence spectra of the phosphors were measured using a fluorescent spectrophotometer (FL3-221, HORIBA, Jobin Yvon, France). The fluorescent quantum yields were measured using an integrating sphere (F-3018). Excitation light source: 450W xenon lamp; surface

coating of the integrating sphere: barium sulfate; data acquiring technology: single photo counting mode; excitation wavelength: 395 nm, 465 nm. All measurements were carried out at room temperature.

Reference:

- [1] A.C. Larson and R.B. Von Dreele, *Los Alamos National Laboratory Report LAUR*, 86-748 (1994).
- [2] B. H. Toby, *J. Appl. Cryst.*, 2001, **34**, 210-213.

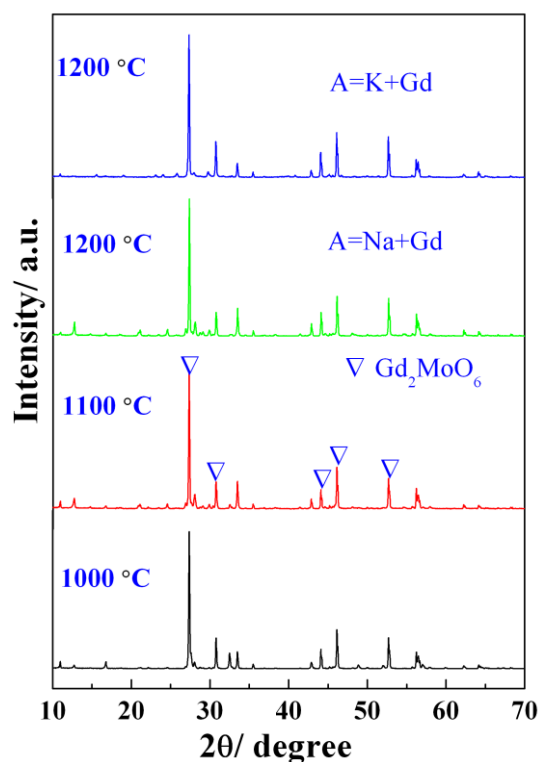

Fig. S1 XRD patterns of  $RGdMgWO_6:Eu$  ( $R=Na/K$ ) under enhanced calcination temperatures

At present,  $AA'MgMoO_6$  does not exist in the world. We have made many attempt to obtain this material including increasing the calcination temperatures and changing the combination of  $A+A'$  cations but still failed. Their XRD patterns are shown in Fig. S1 and are only indexed by  $Gd_2MoO_6$  phase.
